# Supplementary material for: A refined dose metric for nanotoxicology based on surface site reactivity for oxidative potential of engineered nanomaterials
Source: Royal Society of Chemistry journal article supplement (doi:10.1039/d5na00104h), 2025-01-01
Supplement: d5na00104h1.pdf [file d5na00104h1.pdf]

1 **A refined dose metrics for nanotoxicology based on surface sites reactivity for**  
2 **oxidative potential of engineered nanomaterials**

3

4 Victor Alcolea-Rodriguez<sup>a,b\*</sup>, Felice C. Simeone<sup>c</sup>, Nicolás Coca-López<sup>a</sup>, Verónica I. Dumit<sup>b</sup>,  
5 Lara Faccani<sup>c</sup>, Andrea Haase<sup>b</sup>, Raquel Portela<sup>a</sup>, Miguel A. Bañares<sup>a\*</sup>

6

7 <sup>a</sup> CSIC-ICP, Instituto de Catálisis y Petroleoquímica, Spectroscopy and Industrial Catalysis (SpeiCat),  
8 Marie Curie 2, 28034-Madrid, Spain.

9 <sup>b</sup> Department of Chemical and Product Safety, German Federal Institute for Risk Assessment, Berlin  
10 10589, Germany

11 <sup>c</sup> National Research Council of Italy (CNR), Istituto per la Scienza, Sostenibilità e Tecnologia dei  
12 Materiali Ceramici (ISSMC), Via Granarolo, 64, 48018 Faenza (RA), Italy

13

14 **\*Corresponding author:** Miguel A. Bañares

15 **Table of content**

|    |          |                                                                                 |          |
|----|----------|---------------------------------------------------------------------------------|----------|
| 16 | <b>1</b> | <b>Nanomaterials</b> .....                                                      | <b>2</b> |
| 17 | <b>2</b> | <b>Reactive characterization methods</b> .....                                  | <b>3</b> |
| 18 | 2.1      | Consumption of DTT antioxidant.....                                             | 3        |
| 19 | 2.2      | Consumption of glutathione and cysteine antioxidants .....                      | 3        |
| 20 | 2.3      | Hydroxyl radicals trapping with RNO.....                                        | 3        |
| 21 | 2.4      | DCFH <sub>2</sub> assay for ROS detection .....                                 | 3        |
| 22 | <b>3</b> | <b>Results</b> .....                                                            | <b>5</b> |
| 23 | 3.1      | DCFH <sub>2</sub> depletion .....                                               | 5        |
| 24 | 3.2      | Methanol-TPSR .....                                                             | 5        |
| 25 | 3.3      | Probe molecules correlation .....                                               | 6        |
| 26 | 3.4      | Reactive site-based dose-metrics applied to <i>in vitro</i> toxicity data ..... | 6        |
| 27 | 3.5      | Probe molecules and normalization methods: comparison .....                     | 6        |
| 28 | 3.6      | Raw data of DTT, Cys, GSH and RNO reactions.....                                | 1        |
| 29 | <b>4</b> | <b>REFERENCES</b> .....                                                         | <b>1</b> |
| 30 | <b>5</b> | <b>ACKNOWLEDGMENTS</b> .....                                                    | <b>3</b> |

31

32

33

34

35

36 **1 Nanomaterials**37 **Table S 1.** *Physicochemical properties reported in the literature for the studied nanomaterials from JRC, Sigma-Aldrich*  
38 *and PRINTEX.*

39

| NM                                      | Supplier code             | Particle size (nm)            | Particle size distribution (nm)                                                                | Specific surface area (m <sup>2</sup> /g) | Other information                                                                                                    | Ref.    |
|-----------------------------------------|---------------------------|-------------------------------|------------------------------------------------------------------------------------------------|-------------------------------------------|----------------------------------------------------------------------------------------------------------------------|---------|
| <b>TiO<sub>2</sub></b><br><b>NM 101</b> | JRCNM01001a               | 5-9                           | <100 → 95%<br><50 → 77 %<br><10 → 11 %                                                         | 170/316                                   | Anatase<br>Thermal synthesis<br>Photocatalytic activity                                                              | 1-3     |
| <b>TiO<sub>2</sub></b><br><b>NM 105</b> | JRCNM01005a               | 15-24                         | NA                                                                                             | 52.81-55.49<br>46                         | 83% anatase-17% rutile                                                                                               | 1,2     |
| <b>CeO<sub>2</sub></b><br><b>NM 211</b> | JRCNM02101a               | 10.3                          | In water:<br>D <sub>10</sub> 810 ± 160<br>D <sub>50</sub> 202 ± 17<br>D <sub>90</sub> 130 ± 60 | 65                                        | Precipitated<br>Ce:O = 1:2 (XPS)                                                                                     | 2,4     |
| <b>CeO<sub>2</sub></b><br><b>NM212</b>  | JRCNM02102a               | 28.4 ± 10.4                   | NA                                                                                             | 27.2 ± 0.9                                | Cubic cerionite                                                                                                      | 2,4     |
| <b>ZnO</b><br><b>NM 110</b>             | JRCNM62101a               | 202.6 ± 12.8                  | DI water (nm)<br>D10 286±2<br>D50 82.8±1.9<br>D90 107.3±1.7                                    | 12.4                                      | Zincite<br>ζ: -19.1 ± 0.5 mV                                                                                         | 2,5     |
| <b>ZnO</b><br><b>NM 111</b>             | JRCNM01101a               | 140.8 ± 65.8                  | NA                                                                                             | 15.1 ± 0.6                                | Coated with triethoxycapryl silane                                                                                   | 2,5     |
| <b>SiO<sub>2</sub></b><br><b>NM 200</b> | JRCNM02000a               | 14-23                         | <100 → 89%<br><50 → 70 %<br><10 → 2 %                                                          | 189                                       | Amorphous<br>Precipitated                                                                                            | 2,6     |
| <b>SiO<sub>2</sub></b><br><b>NM 201</b> | JRCNM02001a               | 17-20                         | <100 nm - 81.5%,<br><50 nm - 55.3%<br><10 nm - 1.1%                                            | 140                                       | ζ (pH 6.9, milliQ water): -<br>51.7 mV<br>Na-4400 ppm, Al- 7400 ppm,<br>S- 4600 ppm, Si -45.27 wt<br>%, O- 53.08 wt% | 2,6     |
| <b>Fe<sub>2</sub>O<sub>3</sub></b>      | 544884<br>(Sigma-Aldrich) | 35 ± 14                       | NA                                                                                             | 39                                        | Impurities <0.5%                                                                                                     | 7       |
| <b>CuO</b>                              | 544868<br>(Sigma-Aldrich) | 33.3 ± 10.7                   | 10-100 nm                                                                                      | 11                                        | Tenorite<br>77-82.6 % Cu<br>Crystallite size: 17 nm<br>IEP: 8.3, ζ: 15.1 ± 9.4 mV                                    | 8-11    |
| <b>Mn<sub>2</sub>O<sub>3</sub></b>      | ?                         | ?                             | ?                                                                                              | ?                                         | ?                                                                                                                    |         |
| <b>Carbon black</b>                     | Printex90                 | Particle: 19<br>Aggregate: 58 | ?                                                                                              | 317                                       | ellipsoidal primary particles<br>aspect ratio of 1,4 – 1,5                                                           | 12      |
| <b>MWCNTs</b><br><b>NM400</b>           | JRCNM04000a               | L: 846<br>D: 11               | -                                                                                              | 254                                       | -                                                                                                                    | 2,13-15 |
| <b>MWCNTs</b><br><b>NM401</b>           | JRCNM04001a               | L:4048<br>D: 67               | -                                                                                              | 140                                       | -                                                                                                                    | 2,13-15 |

40

41

## 42 **2 Reactive characterization methods**

### 43 **2.1 Consumption of DTT antioxidant**

44 A 200 µg/mL suspension of ENM in 1 mM phosphate buffer is prepared by sonication,  
45 following NanoGenoTox SOP (16 min at 400 W and 10% amplitude). A total of 3 mL of the  
46 ENM suspension is incubated for 1 h at 37 °C and 500 rpm with 3 mL of 100 µM DTT,  
47 following a procedure described elsewhere (Alcolea-Rodriguez et al, under revision) DTT  
48 oxidation rate was normalized per mass ( $\text{mol}\cdot\text{g}^{-1}\cdot\text{s}^{-1}$ ), surface area ( $\mu\text{mol}\cdot\text{m}^{-2}\cdot\text{s}^{-1}$ ) or reactive  
49 surface sites, that is DTT OxTOF ( $\text{s}^{-1}$ ).

50

### 51 **2.2 Consumption of glutathione and cysteine antioxidants**

52 A 1 mM suspension of ENM in 2 mM solution of GSH and Cys in PBS (0.01 M; pH=7.4) was  
53 prepared in a 12 mL test tube. After incubation for 24 h, the suspension was filtered to  
54 eliminate the nanoparticles. Non-oxidized thiol groups were quantified by adding the Ellman  
55 reagent up to a final concentration of 3 mM. Absorbance at 410 nm was measured to  
56 calculate the amount of unreacted -SH groups from a calibration curve. For each ENM, -SH  
57 consumption was measured in triplicate.

58

### 59 **2.3 Hydroxyl radicals trapping with RNO**

60 A 2 mM ENM suspension in PBS was mixed in a test tube with 3 mM RNO. After 24 h  
61 incubation, nanoparticles were filtered out and the absorbance of the solution at 430 nm was  
62 measured to calculate RNO depletion from a linear calibration curve, and thus quantify the  
63 production of OH\* radicals. The assay was repeated in triplicate for each ENM.

64

### 65 **2.4 DCFH<sub>2</sub> assay for ROS detection**

66 DCFH<sub>2</sub>-DA is a lipophilic non-fluorescent probe molecule commonly used in a well-known  
67 methodology for NMs screening in previous literature<sup>16,17,71 18, 19, 20</sup> to unravel ROS induction  
68 in both a cell-free environment and *in vitro* assays. The reactive mechanism is based on a  
69 first step of diacetate removal by alkaline hydrolysis, followed by the reaction between  
70 different kinds of generated ROS species and DCFH<sub>2</sub> to produce DCF<sup>-</sup>, which is quantified  
71 by fluorescence. DCFH<sub>2</sub>-DA was hydrolyzed to DCFH<sub>2</sub> by incubation of 0.01M NaOH with  
72 200 µM DCFH<sub>2</sub>-DA at room temperature for 30 min in a covered vessel protected from light.  
73 Then, 0.1 M PBS was introduced to finish deacetylation, until a concentration of 50 µM  
74 DCFH<sub>2</sub>. A second dilution was performed with 0.01M PBS to obtain a 10 µM solution that

75 was kept on ice until use. Test ENM stock suspensions were prepared by sonication  
76 following NanoGenoTox SOP at a concentration of 2.56 mg/mL. Then, dilutions to 15, 31,  
77 63, 125, 250, 500 and 1000  $\mu\text{g/mL}$  were prepared with phenol red-free Minimum Essential  
78 Medium (MEM). Finally, using a multi-channel pipette, in each of the wells of a clear-flat-  
79 bottom 96-well plate 225  $\mu\text{L}$  DCFH<sub>2</sub> solution was added to 25  $\mu\text{L}$  ENM suspension. Final test  
80 ENM concentration in reaction mixtures was: 1.5, 3.1, 6.3, 12.5, 25.0, 50.0 and 100.0  $\mu\text{g/mL}$ .  
81 Fluorescence at ex/em 485/520 was measured immediately after reaction sample  
82 preparation as well as after 30-, 60- and 90-min incubation performed at 37 °C protected  
83 from light. The assay was done per triplicate (n=3). Nanomaterial interference was tested  
84 employing positive controls and a calibration curve to ensure the proper execution of the  
85 assay.

86

87 **Calibration.** Fluorescein solutions were used as standard to obtain a calibration curve for  
88 quantification. Fluorescein diacetate (F-DA) 200  $\mu\text{M}$  was incubated with 0.01M NaOH at  
89 room temperature, protected from light, for 5 min. The reaction finished when 0.1M PBS was  
90 added, generating fluorescein 50  $\mu\text{M}$ . 0.01M PBS was used to prepare serial dilutions at the  
91 following concentrations: 0.001, 0.004, 0.012, 0.037, 0.111, 0.333, 1.000  $\mu\text{M}$ .

92

93 **Positive controls.** Printex® 90 carbon black and 3-Morpholinopyrrolidine hydrochloride  
94 (SIN-1) were used as nanomaterial and chemical positive controls, respectively.  
95 Suspensions were prepared following the same procedure as with the test ENMs for final  
96 concentrations of 1.6, 3.1, 6.3 and 12.5  $\mu\text{g/mL}$ . SIN-1 100  $\mu\text{M}$  solutions were prepared in  
97 MEM and diluted to 13, 25 and 50  $\mu\text{M}$  to provide a final assay concentration after mixture  
98 with DCFH<sub>2</sub> of 1.3, 2.5, 5.0 and 10.0  $\mu\text{M}$ .

99

100 **Nanomaterial interference evaluation.** Fluorescence quenching and auto-fluorescence of  
101 ENMs was assessed at all experimental doses (from 1.6 to 100  $\mu\text{g/mL}$ ) in a black clear-  
102 bottom 96-well plate. 225  $\mu\text{L}$  of F-DA or PBS were added to 25  $\mu\text{L}$  of test ENM dispersion  
103 to evaluate fluorescence or auto-fluorescence quenching, respectively. All wells were  
104 immediately measured at ex/em 485/520.

105

106

107 **3 Results**

108 **3.1 DCFH<sub>2</sub> depletion**

109 **Table S 2.** DCFH<sub>2</sub> depletion rates at 50 µg/mL of ENM normalized by mass, area and sites. ENMs were clustered  
 110 using k-means algorithm into three reactivity categories for ROS generation: high, moderate or low.

| Nanomaterial            | Mass                                                   |                 | Area                                                   |                 | Site (OxTOF)                     |                 |
|-------------------------|--------------------------------------------------------|-----------------|--------------------------------------------------------|-----------------|----------------------------------|-----------------|
|                         | Reaction rate (nmol·s <sup>-1</sup> ·g <sup>-1</sup> ) | k-means cluster | Reaction rate (µmol·s <sup>-1</sup> ·m <sup>-2</sup> ) | k-means cluster | Reaction rate (s <sup>-1</sup> ) | k-means cluster |
| TiO <sub>2</sub> NM-101 | 0.02                                                   | Low             | 4.81·10 <sup>-8</sup>                                  | Low             | 3.9·10 <sup>-9</sup>             | Low             |
| TiO <sub>2</sub> NM-105 | 0.33                                                   | Moderate        | 5.77·10 <sup>-6</sup>                                  | Moderate        | 3.0·10 <sup>-7</sup>             | Low             |
| ZnO NM-111              | 0.07                                                   | Low             | 4.76·10 <sup>-6</sup>                                  | Moderate        | 7.1·10 <sup>-7</sup>             | Moderate        |
| CeO <sub>2</sub> NM-212 | 0.10                                                   | Low             | 3.94·10 <sup>-6</sup>                                  | Moderate        | 2.5·10 <sup>-7</sup>             | Low             |
| MWCNT NM-400            | 2.46                                                   | High            | 1.03·10 <sup>-5</sup>                                  | High            | 1.4·10 <sup>-6</sup>             | High            |
| Carbon black            | 2.77                                                   | High            | 8.73·10 <sup>-6</sup>                                  | High            | NA                               | NA              |

111

112

**3.2 Methanol-TPSR**

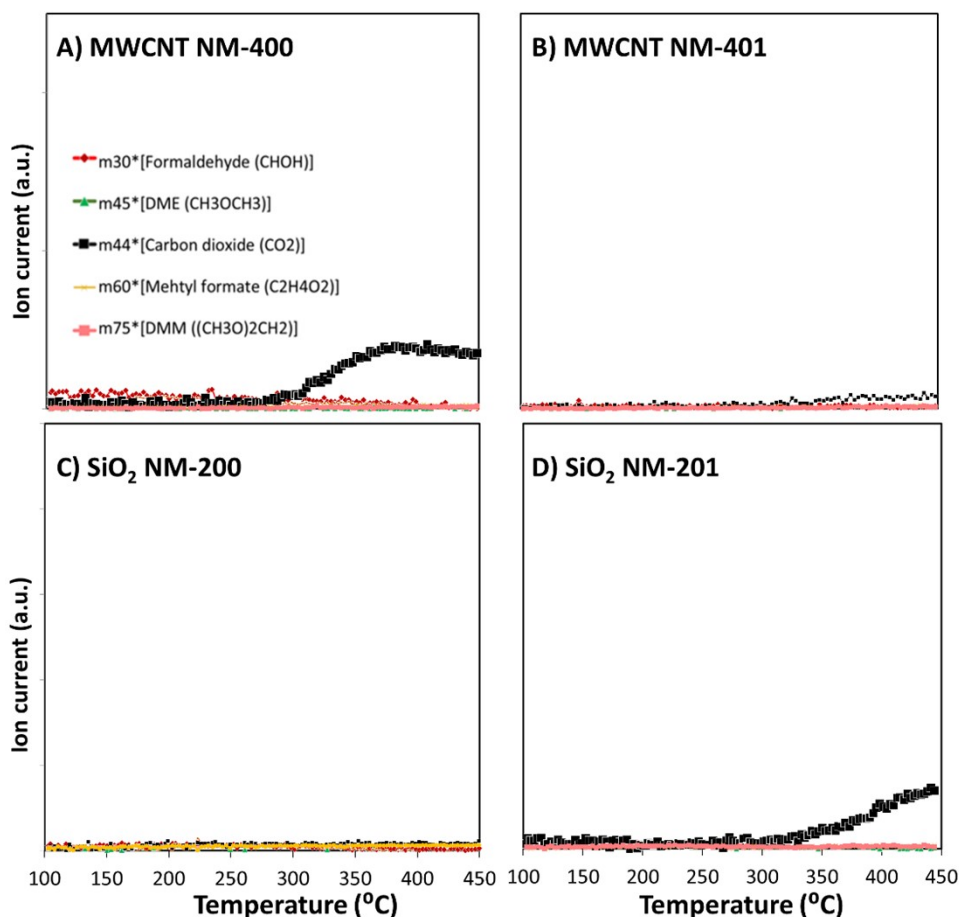

113

114 **Figure S 1.** Temperature-programmed surface reaction products of pre-adsorbed methanol analysed by mass  
 115 spectroscopy for two different MWCNT (NM-400 (a) and NM-401 (b), and two different SiO<sub>2</sub> (NM-200 (c) and  
 116 NM-201 (d)). Formaldehyde (red) is formed at redox sites, dimethyl ether (green) at acid sites, and carbon  
 117 dioxide (black) at basic or high reactive redox sites.

118

119 **3.3 Reactive site-based dose-metrics applied to *in vitro* toxicity data**

120 **Table S 3.** No observed adverse effect concentration (NOAEC) of reactive sites ( $\mu\text{mol} / \text{L}$ ) for *in vitro* assays  
 121 with WST-1 and LDH release tests performed in A549 and dTHP-1 cell lines after 24 h exposure to ENMs. Data  
 122 source: Alcolea-Rodriguez et al<sup>21</sup>

| ENM                            | A549 |       | dTHP-1 |       |
|--------------------------------|------|-------|--------|-------|
|                                | LDH  | WST-1 | LDH    | WST-1 |
| TiO <sub>2</sub> NM-101        | 280  | 280   | 280    | 280   |
| TiO <sub>2</sub> NM-105        | 110  | 110   | 110    | 110   |
| ZnO NM-110                     | 20   | 2.5   | 20     | 0.28  |
| ZnO NM-111                     | 5    | 1.25  | 10     | 0.3   |
| SiO <sub>2</sub> NM-200        | 30   | 30    | 30     | 30    |
| SiO <sub>2</sub> NM-201        | 50   | 50    | 50     | 50    |
| CeO <sub>2</sub> NM-211        | 40   | 40    | 40     | 40    |
| CeO <sub>2</sub> NM-212        | 40   | 40    | 40     | 40    |
| CuO                            | 1.2  | 1.2   | 1.2    | 2.4   |
| Fe <sub>2</sub> O <sub>3</sub> | 100  | 100   | 100    | 100   |

123

124

125 **3.4 Probe molecules and normalization methods: comparison**

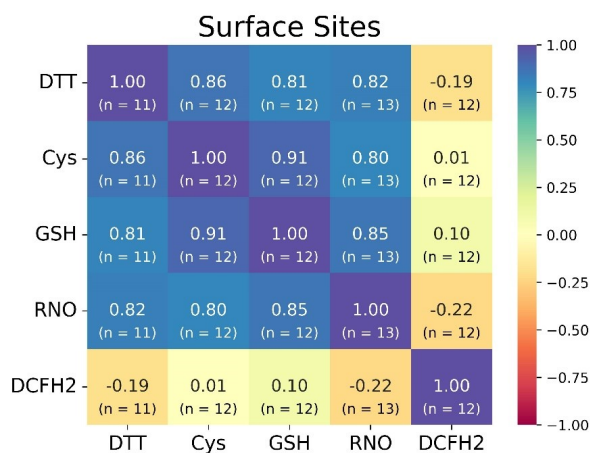

126

127 **Figure S2.** Heatmap of Pearson's correlation coefficients for the probe reaction results normalized by reactive  
 128 site.

129

130 The pairplot in *Figure S3* supports our hypothesis, due to it emphasizes the pairwise  
 131 relationships among the normalization strategies applied to the probe reactions under study,  
 132 indicating that depending on the probe molecule the data tend to cluster into three distinct  
 133 groups. The first group comprises Cys, GSH, and RNO; the second group consists of DTT,

134 and the third group comprises DCFH<sub>2</sub>. Within each of these groups, the relationships among  
135 the normalization techniques approximate linearity.  
136

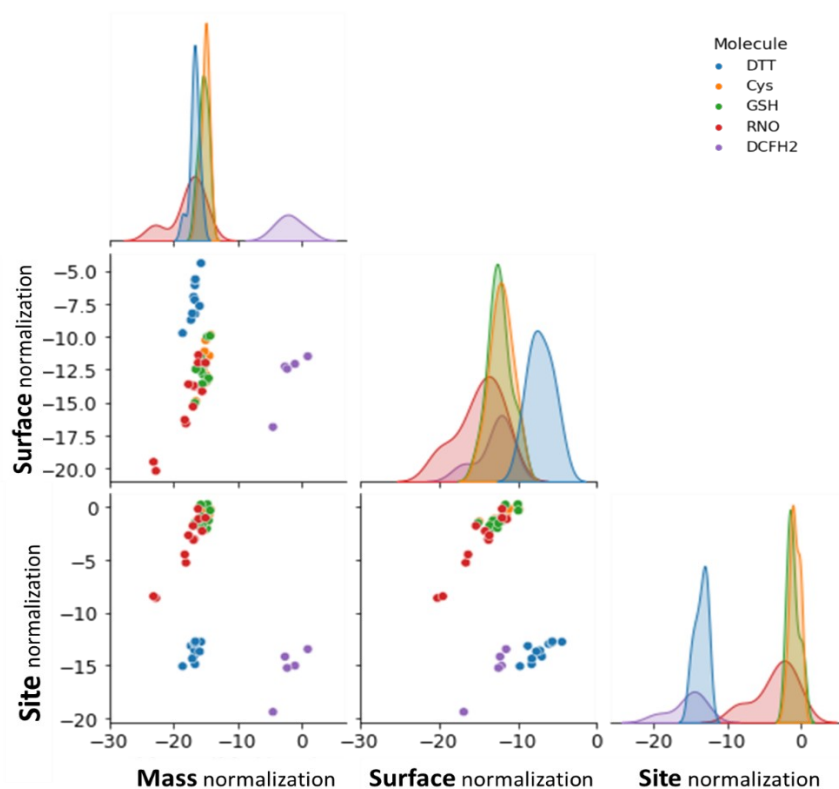

137

138 **Figure S3.** Pairplot for comparison of normalization methods in the evaluated probe reactions

139

140 In the pairplot, rows and columns represent the x and y axis, respectively. The diagonal  
141 subplots provide the probability density function (PDF) for the respective normalization  
142 variable and probe molecule. The outcomes of various probe reactions were assessed  
143 through the Pearson correlation coefficient, as a linear correlation is anticipated in the  
144 reactivity context.

145

146

147

148

149 **Table S4.** Interference test for DCFH<sub>2</sub> assay: results indicating up to 30% interference are denoted by red boxes.

| Dose<br>(µg/mL) | Interference (%)           |                            |               |               |                            |                            |                            |                            |                 |    |                                |     |  |
|-----------------|----------------------------|----------------------------|---------------|---------------|----------------------------|----------------------------|----------------------------|----------------------------|-----------------|----|--------------------------------|-----|--|
|                 | TiO <sub>2</sub><br>NM-101 | TiO <sub>2</sub><br>NM-105 | ZnO<br>NM-110 | ZnO<br>NM-111 | CeO <sub>2</sub><br>NM-211 | CeO <sub>2</sub><br>NM-212 | SiO <sub>2</sub><br>NM-200 | SiO <sub>2</sub><br>NM-201 | MWCNT<br>NM-400 | CB | Fe <sub>2</sub> O <sub>3</sub> | CuO |  |
| 0               | 0                          | 0                          | 0             | 0             | 0                          | 0                          | 0                          | 0                          | 0               | 0  | 0                              | 0   |  |
| 1.6             | 0                          | 0                          | 2             | 2             | 1                          | -1                         | -1                         | 0                          | 6               | 1  | 0                              | 3   |  |
| 3.1             | 2                          | 0                          | 4             | 4             | 0                          | 2                          | -1                         | 2                          | 19              | 3  | 4                              | 5   |  |
| 6.3             | 0                          | -1                         | 9             | 12            | -1                         | 6                          | -1                         | -2                         | 37              | 6  | 5                              | 9   |  |
| 12.5            | 0                          | 1                          | 20            | 19            | 0                          | 10                         | -3                         | -2                         | 65              | 30 | 8                              | 17  |  |
| 25              | 2                          | 1                          | 20            | 20            | 0                          | 17                         | -2                         | -1                         | 90              | 80 | 16                             | 30  |  |
| 50              | -8                         | 0                          | 20            | 20            | 0                          | 17                         | 0                          | -2                         | 99              | 96 | 29                             | 42  |  |
| 100             | 6                          | 9                          | 5             | 5             | 8                          | 4                          | 9                          | 8                          | 0               | 9  | 11                             | 11  |  |

150

151



152

## 3.5

## Raw data of DTT, Cys, GSH and RNO reactions

153

154

Table S5. Raw data for DTT and GSH reactions

| Nanomaterial                   | DTT conversion (%) |      | DTT NIOG (0-1) |     | DTT reaction rate per mass (mol/s·g) |         | DTT reaction rate per area (umol/s·m <sup>2</sup> ) |        | DTT OxTOF (s-1) |        | GSH mol consumed/mg |        | GSH mol consumed/mol |        | GSH mol consumed/mol |        | GSH mol consumed/mol sites |        |
|--------------------------------|--------------------|------|----------------|-----|--------------------------------------|---------|-----------------------------------------------------|--------|-----------------|--------|---------------------|--------|----------------------|--------|----------------------|--------|----------------------------|--------|
|                                | $\bar{x}$          | SD   | $\bar{x}$      | SD  | $\bar{x}$                            | SD      | $\bar{x}$                                           | SD     | $\bar{x}$       | SD     | $\bar{x}$           | SD     | $\bar{x}$            | SD     | $\bar{x}$            | SD     | $\bar{x}$                  | SD     |
| TiO <sub>2</sub> NM-101        | 37.9               | 7.0  | 0.5            | 0.1 | 5.8E-8                               | 9.7E-10 | 2.6E-4                                              | 4.3E-6 | 1.4E-5          | 1.2E-5 | 3.6E-7              | 1.4E-7 | 2.8E-2               | 1.1E-2 | 1.6E-6               | 6.1E-7 | 1.3E-1                     | 4.9E-2 |
| TiO <sub>2</sub> NM105         | 30.6               | 9.6  | 0.4            | 0.1 | 4.7E-8                               | 1.3E-8  | 9.4E-4                                              | 2.6E-4 | 4.3E-5          | 1.2E-5 | 2.8E-7              | 1.9E-7 | 2.3E-2               | 1.5E-2 | 5.7E-6               | 3.8E-6 | 2.6E-1                     | 1.7E-1 |
| ZnO NM110                      | 0.0                | 0.0  | 0.0            | 0.0 | 0.0E+0                               | NA      | NA                                                  | NA     | NA              | NA     | 4.0E-7              | 4.7E-9 | 3.2E-2               | 3.8E-4 | 4.6E-5               | 5.4E-7 | 2.0E+0                     | 2.4E-2 |
| ZnO NM111                      | 0.0                | 0.0  | 0.0            | 0.0 | 0.0E+0                               | NA      | NA                                                  | NA     | NA              | NA     | 1.4E-7              | 0.0E+0 | 1.3E-7               | 6.1E-9 | 9.5E-6               | 0.0E+0 | 1.2E+0                     | 0.0E+0 |
| SiO <sub>2</sub> NM200         | 18.5               | 12.7 | 0.2            | 0.1 | 3.0E-8                               | 2.1E-8  | 1.6E-4                                              | 1.1E-4 | 1.2E-4          | 7.9E-5 | 5.7E-8              | 6.2E-8 | 3.4E-3               | 3.7E-3 | 3.0E-7               | 3.3E-7 | 2.2E-1                     | 2.4E-1 |
| SiO <sub>2</sub> NM201         | 4.6                | 1.4  | 0.1            | 0.0 | 8.3E-9                               | 2.5E-9  | 6.0E-5                                              | 1.8E-5 | 1.7E-5          | 5.3E-6 | NA                  | NA     | NA                   | NA     | NA                   | NA     | NA                         | NA     |
| CeO <sub>2</sub> NM211         | 32.2               | 10.5 | 0.4            | 0.1 | 5.6E-8                               | 1.9E-8  | 7.4E-4                                              | 2.5E-4 | 7.8E-5          | 2.6E-5 | 2.0E-7              | 1.8E-8 | 3.4E-2               | 3.2E-3 | 2.6E-6               | 2.4E-7 | 2.7E-1                     | 2.5E-2 |
| CeO <sub>2</sub> NM212         | 42.7               | 8.7  | 0.5            | 0.1 | 5.7E-8                               | 1.2E-8  | 2.3E-3                                              | 4.6E-4 | 1.4E-4          | 2.9E-5 | 1.6E-7              | 2.3E-9 | 2.8E-2               | 3.9E-4 | 6.3E-6               | 9.0E-8 | 4.0E-1                     | 5.6E-3 |
| MWCNT NM400                    | 73.5               | 6.0  | 0.9            | 0.1 | 1.2E-7                               | 1.1E-8  | 4.7E-4                                              | 4.3E-5 | 7.0E-5          | 6.4E-6 | 4.7E-7              | 6.8E-9 | 0.0E+0               | 0.0E+0 | 2.0E-6               | 2.8E-8 | 2.7E-1                     | 4.0E-3 |
| MWCNT NM401                    | 28.1               | 16.5 | 0.4            | 0.2 | 3.7E-8                               | 3.5E-8  | 2.7E-4                                              | 2.5E-4 | 3.5E-5          | 3.3E-5 | 1.8E-7              | 7.4E-8 | 0.0E+0               | 0.0E+0 | 1.3E-6               | 5.3E-7 | 1.7E-1                     | 7.0E-2 |
| CuO                            | 82.6               | 9.5  | 1.0            | 0.0 | 1.5E-7                               | 3.1E-8  | 1.2E-2                                              | 2.6E-3 | 3.7E-4          | 7.8E-5 | 5.9E-7              | 2.0E-9 | 4.7E-2               | 1.6E-4 | 4.8E-5               | 1.6E-7 | 1.5E+0                     | 5.1E-3 |
| Carbon black                   | 86.3               | 0.2  | 1.1            | 0.0 | 2.0E-7                               | 4.9E-10 | 6.2E-4                                              | 1.6E-6 | 0.0E+0          | 0.0E+0 | 4.1E-7              | 1.7E-9 | 0.0E+0               | 0.0E+0 | 1.3E-6               | 5.4E-9 | 0.0E+0                     | 0.0E+0 |
| Fe <sub>2</sub> O <sub>3</sub> | 30.3               | 5.5  | 0.4            | 0.1 | 5.7E-8                               | 1.1E-8  | 3.3E-3                                              | 6.3E-4 | 1.8E-4          | 3.5E-5 | 1.4E-7              | 1.2E-8 | 2.2E-2               | 2.0E-3 | 3.4E-6               | 3.0E-7 | 1.3E-1                     | 1.2E-2 |
| Mn <sub>2</sub> O <sub>3</sub> | 33.3               | 3.0  | 0.4            | 0.0 | 6.1E-8                               | 5.4E-9  | 3.6E-3                                              | 3.2E-4 | 1.9E-4          | 1.7E-5 | 6.5E-8              | 2.0E-8 | 1.0E-2               | 3.2E-3 | 3.8E-6               | 1.2E-6 | 2.1E-1                     | 6.5E-2 |

155

Table S6. Raw data for Cys and RNO reactions

| Nanomaterial            | Cys mol consumed/mg |        | Cys mol consumed/mol |         | Cys mol consumed/m <sup>2</sup> |        | Cys mol consumed/mol sites |        | RNO mol consumed/mg |        | RNO mol consumed/mol |        | RNO mol consumed/m <sup>2</sup> |        | RNO mol consumed/mol sites |        |
|-------------------------|---------------------|--------|----------------------|---------|---------------------------------|--------|----------------------------|--------|---------------------|--------|----------------------|--------|---------------------------------|--------|----------------------------|--------|
|                         | $\bar{x}$           | SD     | $\bar{x}$            | SD      | $\bar{x}$                       | SD     | $\bar{x}$                  | SD     | $\bar{x}$           | SD     | $\bar{x}$            | SD     | $\bar{x}$                       | SD     | $\bar{x}$                  | SD     |
| TiO <sub>2</sub> NM-101 | 3.2E-7              | 0.0E+0 | 2.5E-2               | 4.2E-18 | 1.4E-6                          | 0.0E+0 | 1.1E-1                     | 0.0E+0 | 1.4E-8              | 7.1E-9 | 5.3E-4               | 2.7E-4 | 6.2E-8                          | 3.2E-8 | 5.1E-3                     | 2.6E-3 |

|              |        |         |        |        |        |        |        |        |         |         |        |         |        |         |        |         |
|--------------|--------|---------|--------|--------|--------|--------|--------|--------|---------|---------|--------|---------|--------|---------|--------|---------|
| TiO2 NM105   | 5.3E-7 | 2.7E-10 | 4.3E-2 | 2.2E-5 | 1.1E-5 | 5.5E-9 | 4.9E-1 | 2.5E-4 | 5.1E-8  | 7.2E-9  | 1.9E-3 | 2.7E-4  | 1.0E-6 | 1.5E-7  | 4.7E-2 | 6.7E-3  |
| ZnO NM110    | 3.0E-7 | 4.1E-9  | 2.5E-2 | 3.3E-4 | 3.5E-5 | 4.7E-7 | 1.5E+0 | 2.0E-2 | 9.8E-8  | 1.9E-8  | 7.8E-3 | 1.5E-3  | 1.1E-5 | 2.2E-6  | 4.9E-1 | 9.5E-2  |
| ZnO NM111    | 1.0E-7 | 5.9E-9  | 1.7E-2 | 9.6E-4 | 7.0E-6 | 3.9E-7 | 9.0E-1 | 5.1E-2 | 9.4E-8  | 8.0E-9  | 7.5E-3 | 6.4E-4  | 6.3E-6 | 5.4E-7  | 8.1E-1 | 6.9E-2  |
| SiO2 NM200   | 6.5E-8 | 2.6E-8  | 3.9E-3 | 1.6E-3 | 3.4E-7 | 1.4E-7 | 2.5E-1 | 9.9E-2 | 4.3E-8  | 4.1E-9  | 2.6E-3 | 2.5E-4  | 2.3E-7 | 2.2E-8  | 1.6E-1 | 1.6E-2  |
| SiO2 NM201   | NA     | NA      | NA     | NA     | NA     | NA     | NA     | NA     | NA      | NA      | NA     | NA      | NA     | NA      | NA     | NA      |
| CeO2 NM211   | 2.3E-7 | 1.9E-8  | 4.0E-2 | 3.2E-3 | 3.1E-6 | 2.5E-7 | 3.2E-1 | 2.6E-2 | 1.3E-10 | 1.4E-18 | 2.2E-5 | 2.5E-13 | 1.7E-9 | 1.9E-17 | 1.8E-4 | 2.0E-12 |
| CeO2 NM212   | 1.5E-7 | 0.0E+0  | 5.1E-2 | 8.5E-6 | 5.8E-6 | 0.0E+0 | 3.6E-1 | 0.0E+0 | 8.6E-11 | 0.0E+0  | 1.5E-5 | 2.1E-21 | 3.4E-9 | 0.0E+0  | 2.1E-4 | 0.0E+0  |
| MWCNT NM400  | 4.0E-7 | 1.0E-9  | 0.0E+0 | 0.0E+0 | 1.7E-6 | 4.2E-9 | 2.3E-1 | 5.8E-4 | 1.7E-7  | 2.9E-9  | 0.0E+0 | 0.0E+0  | 7.2E-7 | 1.2E-8  | 1.0E-1 | 1.7E-3  |
| MWCNT NM401  | 3.4E-7 | 2.3E-8  | 0.0E+0 | 0.0E+0 | 2.4E-6 | 1.6E-7 | 3.2E-1 | 2.2E-2 | 1.2E-8  | 2.0E-8  | 0.0E+0 | 0.0E+0  | 8.3E-8 | 1.4E-7  | 1.1E-2 | 1.9E-2  |
| CuO          | 6.5E-7 | 7.1E-9  | 5.2E-2 | 5.7E-4 | 5.3E-5 | 5.8E-7 | 1.6E+0 | 1.8E-2 | 2.9E-7  | 0.0E+0  | 2.2E-2 | 0.0E+0  | 2.4E-5 | 0.0E+0  | 7.3E-1 | 0.0E+0  |
| Carbon black | 4.6E-7 | 1.6E-8  | 0.0E+0 | 0.0E+0 | 1.5E-6 | 5.1E-8 | 0.0E+0 | 0.0E+0 | 1.6E-7  | 7.9E-10 | 0.0E+0 | 0.0E+0  | 5.0E-7 | 2.5E-9  | 0.0E+0 | 0.0E+0  |
| Fe2O3        | 2.7E-7 | 1.4E-10 | 4.3E-2 | 2.2E-5 | 6.6E-6 | 3.4E-9 | 2.6E-1 | 1.3E-4 | 4.5E-8  | 2.7E-9  | 7.3E-3 | 4.3E-4  | 1.1E-6 | 6.6E-8  | 4.4E-2 | 2.6E-3  |
| Mn2O3        | 2.5E-7 | 3.8E-9  | 4.0E-2 | 6.0E-4 | 1.5E-5 | 2.2E-7 | 8.1E-1 | 1.2E-2 | 2.1E-8  | 1.9E-9  | 1.7E-3 | 1.5E-4  | 1.2E-6 | 1.1E-7  | 6.7E-2 | 6.1E-3  |

156  
157

158 **4 REFERENCES**

159

- 160 1. Rasmussen K, Mast J, Temmerman P jan De, et al. *Titanium Dioxide, NM-100, NM-*  
161 *101, NM-102, NM-103, NM-104, NM-105: Characterisation and Physico- Chemical*  
162 *Properties.*; 2014. doi:10.2788/79554
- 163 2. *JRC NANOMATERIALS REPOSITORY. List of Representative Nanomaterials.*;  
164 2016.
- 165 3. Kermanizadeh A, Pojana G, Gaiser BK, et al. In vitro assessment of engineered  
166 nanomaterials using a hepatocyte cell line: Cytotoxicity, pro-inflammatory cytokines  
167 and functional markers. *Nanotoxicology.* 2013;7(3):301-313.  
168 doi:10.3109/17435390.2011.653416
- 169 4. Singh C, Europäische Kommission Gemeinsame Forschungsstelle Institute for  
170 Health and Consumer Protection. *Cerium Dioxide NM-211, NM-212, NM-213,*  
171 *Characterisation and Test Item Preparation JRC Repository: NM-Series of*  
172 *Representative Manufactured Nanomaterials.*; 2014. doi:10.2788/80203
- 173 5. Singh C, Friedrichs S, Levin M, et al. *Zinc Oxide NM-110, NM-111, NM-112, NM-113*  
174 *Characterisation and Test Item Preparation.*; 2011. doi:10.2787/55008
- 175 6. Rasmussen K, Mech A, Mast J, et al. *Synthetic Amorphous Silicon Dioxide (NM-200,*  
176 *NM-201, NM-202, NM-203, NM-204): Characterisation and Physico-Chemical*  
177 *Properties JRC.*; 2013. doi:10.2788/57989
- 178 7. Guichard Y, Schmit J, Darne C, et al. Cytotoxicity and Genotoxicity of Nanosized and  
179 Microsized Titanium Dioxide and Iron Oxide Particles in Syrian Hamster Embryo  
180 Cells. *Ann Occup Hyg.* 2012;56(5):631-644. doi:10.1093/annhyg/mes006
- 181 8. Life M. *Copper Oxide (Ref. Number: 544868) Specifications.*; 2023.  
182 <https://www.sigmaaldrich.com/ES/es/product/aldrich/544868>
- 183 9. Martín-Gómez J, Hidalgo-Carrillo J, Estévez RC, Urbano FJ, Marinas A. Hydrogen  
184 photoproduction on TiO<sub>2</sub>-CuO artificial olive leaves. *Appl Catal A Gen.*  
185 2021;620(March):118178. doi:10.1016/j.apcata.2021.118178
- 186 10. Martín-Gómez J, Hidalgo-Carrillo J, Montes V, et al. EPR and CV studies cast further  
187 light on the origin of the enhanced hydrogen production through glycerol  
188 photoreforming on CuO:TiO<sub>2</sub> physical mixtures. *J Environ Chem Eng.*  
189 2021;9(4):105336. doi:10.1016/j.jece.2021.105336

- 190 11. Pal AK, Bello D, Budhlall B, Rogers E, Milton DK. Screening for oxidative stress  
191 elicited by engineered nanomaterials: Evaluation of acellular DCFH assay. *Dose-*  
192 *Response*. 2012;10(3):308-330. doi:10.2203/dose-response.10-036.Pal
- 193 12. *JOINT MEETING OF THE CHEMICALS COMMITTEE AND THE WORKING PARTY*  
194 *ON CHEMICALS, PESTICIDES AND BIOTECHNOLOGY TITANIUM DIOXIDE:*  
195 *SUMMARY OF THE DOSSIER Series on the Safety of Manufactured Nanomaterials*  
196 *No. 73 16th Meeting of the Working Party on Manufactured Nanomaterials.;* 2016.
- 197 13. Darne C, Desforges A, Berrada N, et al. A non-damaging purification method:  
198 decoupling the toxicity of multi-walled carbon nanotubes and their associated metal  
199 impurities. *Environ Sci Nano*. 2019;6(6):1852-1865. doi:10.1039/C8EN01276H
- 200 14. Arts JHE, Irfan MA, Keene AM, et al. Case studies putting the decision-making  
201 framework for the grouping and testing of nanomaterials (DF4nanoGrouping) into  
202 practice. *Regulatory Toxicology and Pharmacology*. 2016;76:234-261.  
203 doi:10.1016/j.yrtph.2015.11.020
- 204 15. Rasmussen K, Mast J, Temmerman PJ, Verleysen E, Waegeneers N, Steen F. *Multi-*  
205 *Walled Carbon Nanotubes, NM-400, NM-401, NM-402, NM-403: Characterisation*  
206 *and Physico-Chemical Properties In: NM-Series of Representative Manufactured*  
207 *Nanomaterials.;* 2014. doi:10.2788/10753
- 208 16. Pal AK, Bello D, Budhlall B, Rogers E, Milton DK. Screening for oxidative stress  
209 elicited by engineered nanomaterials: Evaluation of acellular DCFH assay. *Dose-*  
210 *Response*. 2012;10(3):308-330. doi:10.2203/dose-response.10-036.Pal
- 211 17. Foucaud L, Wilson MR, Brown DM, Stone V. Measurement of reactive species  
212 production by nanoparticles prepared in biologically relevant media. *Toxicol Lett*.  
213 2007;174(1-3):1-9. doi:10.1016/j.toxlet.2007.08.001
- 214 18. Sauvain JJ, Rossi MJ, Riediker M. Comparison of three acellular tests for assessing  
215 the oxidation potential of nanomaterials. *Aerosol Science and Technology*.  
216 2013;47(2):218-227. doi:10.1080/02786826.2012.742951
- 217 19. Gliga AR, Skoglund S, Odnevall Wallinder I, Fadeel B, Karlsson HL. Size-dependent  
218 cytotoxicity of silver nanoparticles in human lung cells: The role of cellular uptake,  
219 agglomeration and Ag release. *Part Fibre Toxicol*. 2014;11(1):1-17.  
220 doi:10.1186/1743-8977-11-11

- 221 20. Ag Seleci D, Tsiliki G, Werle K, et al. Determining nanoform similarity via assessment  
222 of surface reactivity by abiotic and in vitro assays. *NanoImpact*. 2022;26(September  
223 2021):100390. doi:10.1016/j.impact.2022.100390
- 224 21. Alcolea-Rodriguez V, Dumit VI, Ledwith R, Portela R, Bañares MA, Haase A.  
225 Differentially Induced Autophagy by Engineered Nanomaterial Treatment Has an  
226 Impact on Cellular Homeostasis and Cytotoxicity. doi:10.1021/acs.nanolett.4c01573

227

228

## 229 **5 ACKNOWLEDGMENTS**

230 The authors are grateful for the financial support from the European Commission H2020  
231 project NanoInformaTIX (grant agreement number 814426), and to the German Federal  
232 Institute for Risk Assessment for Victor Alcolea-Rodriguez's stay, which was partially funded  
233 by European Commission H2020 project HARMLESS (grant agreement number 953183).  
234 We are also indebted to F.J. R. Vasques for his support with experimental work at ICP-CSIC.

235

236

237 All authors have given approval to the final version of the manuscript.  
238 The authors declare no competing financial interest.

239
